Y. Tatebe et al., Hypoglycemia caused by pivalate-conjugating antibiotics

1 Risk of hypoglycemia induced by pivalate-conjugated antibiotics in young children: a  
2 population-based retrospective study in Japan

3

4 Yasuhisa Tatebe,<sup>a,b</sup> Toshihiro Koyama,<sup>c</sup> Naoko Mikami,<sup>d</sup> Yoshihisa Kitamura,<sup>b</sup> Toshiaki  
5 Sendo,<sup>b</sup> Shiro Hinotsu<sup>e#</sup>

6

7 <sup>a</sup>Department of Medicinal Pharmacology, Graduate School of Medicine, Dentistry and  
8 Pharmaceutical Sciences, Okayama University, Okayama, Japan;

9 <sup>b</sup>Department of Pharmacy, Okayama University Hospital, Okayama, Japan;

10 <sup>c</sup>Department of Pharmaceuticals Biomedicine, Graduate School of Medicine, Dentistry, and  
11 Pharmaceutical Sciences, Okayama University, Education and Research Center for Clinical  
12 Pharmacy, Graduate School of Medicine, Dentistry and Pharmaceutical Sciences, Okayama  
13 University, Okayama, Japan;

14 <sup>d</sup>Division of Pharmacy, Chiba University Hospital, Chiba, Japan;

15 <sup>e</sup>Center for Innovative Clinical Medicine, Okayama University Hospital, Okayama, Japan

16

17 Running Head: Hypoglycemia caused by pivalate-conjugated antibiotics

18

19 # Corresponding author: Shiro Hinotsu, M.D.

20 Center for Innovative Clinical Medicine, Okayama University Hospital, 2-5-1 Shikata-cho,  
21 Okayama 7008558, Japan

22 TEL: +81-86-235-6599

23 FAX: +81-86-235-6505

24 E-mail: hinotsu-mi@umin.ac.jp

25 **Abstract**

26 Infection is a common cause for an outpatient visit for young children. Pivalate-conjugated  
27 antibiotics (PCAs) are often used for these patients in Japan. However, a few case reports  
28 have shown that PCAs can provoke hypoglycemia in children, but no larger study has shown  
29 that PCAs increase the risk of hypoglycemia. The current study was performed as a  
30 retrospective review of children aged 1 month to 5 years old with at least once prescription of  
31 PCAs or other beta-lactam antibiotics from January 2011 to December 2013, using a medical  
32 and pharmacy claims database. Hypoglycemia was defined based on the International  
33 Statistical Classification of Diseases and Related Health Problems 10th Revision code or  
34 prescription of 10% or 20% glucose injection, and the incidence of hypoglycemic events was  
35 investigated. Logistic regression analysis was performed to examine the risk of hypoglycemia  
36 with PCAs compared with control antibiotics. The study cohort contained 179,594 eligible  
37 patients (male: 52.2%, mean age: 3.2 years). The numbers of prescriptions were 454,153 and  
38 417,287 for PCAs and control antibiotics, respectively. Multivariate analysis showed that  
39 PCAs were associated with hypoglycemia (adjusted OR 1.18, 95% CI 1.12 to 1.24,  $P < 0.01$ ),  
40 and the risk of hypoglycemia was also significantly increased with use of PCAs for  $\leq 7$  days  
41 (adjusted OR 1.17, 95% CI 1.11 to 1.24,  $P < 0.01$ ). These results suggest that prescription of  
42 PCAs to young children should be avoided, even for a short time period.

43

44 Key words: pivalate-conjugated antibiotics, carnitine deficiency, hypoglycemia, children,  
45 claims data

46 **Introduction**

47 Hypoglycemia is a common endocrine emergency and a major concern in neonates, infants  
48 and children because severe hypoglycemia can lead to neurological dysfunction such as  
49 neurocognitive defects, memory deficits, aphasia and hemiparesis (1, 2). In childhood,  
50 hypoglycemia is induced by various causes, including inborn errors of metabolism, infection,  
51 growth hormonal insufficiency, and adrenal insufficiency, as well as medications such as  
52 insulin derivatives and some antiarrhythmic agents (3–5).

53 In Japan, pivalate-conjugated antibiotics (PCAs) are widely used for pediatric patients with  
54 bacterial infections such as acute respiratory tract infection (ARTI) (6). Pivalic acid is  
55 conjugated to oral drugs to improve absorption. After absorption, the pivalic acid is liberated  
56 from these drugs, conjugated with carnitine in the liver, and excreted as the conjugate in  
57 urine, with a corresponding reduction of the serum carnitine concentration (7). Since carnitine  
58 plays an essential role in fatty acid oxidation in mitochondria (8), the reduced serum carnitine  
59 level can decrease lipid utilization for ATP production and result in impairment of  
60 gluconeogenesis, thereby inducing hypoglycemia (9).

61 PCAs have been reported to cause hypoglycemia in children in some cases, with a possible  
62 consequence of encephalopathy (10). Therefore, the Pharmaceutical and Medical Devices  
63 Agency (PMDA) and the Japan Pediatric Society (JPS) have cautioned that PCAs can induce  
64 hypoglycemia and recommended reduced use of these medicines when possible. However,  
65 while there are a few case reports of hypoglycemia induced by PCAs (10–12), no study has  
66 shown that PCAs increase the incidence of hypoglycemia compared with other beta-lactam  
67 antibiotics. Given that PCAs are widely prescribed in Japan, it is important to evaluate the  
68 risk of hypoglycemia with these antibiotics. Therefore, the aim of this study was to examine  
69 the risk of hypoglycemia associated with PCAs compared with other oral beta-lactam  
70 antibiotics using claims data in Japan.

71

## 72 **Methods**

### 73 Study design and data source

74 A retrospective cohort study was performed using a medical and pharmacy claims database  
75 constructed by the Japan Medical Data Center (JMDC, Tokyo, Japan). The Japanese  
76 healthcare system uses employee- or community-based plans with free access to hospitals and  
77 clinics. The JMDC database was launched in 2005 and includes multiple employee-based  
78 insurance plans, but not community-based plans. The population in the database had reached  
79 approximately 3 million at 2013, including a large pediatric population. The database  
80 contains data with an anonymized personal identifier, year of birth, gender, medical  
81 procedures, drugs prescribed and tests ordered, diagnosis, and diagnostic codes using the  
82 International Statistical Classification of Diseases and Related Health Problems 10th  
83 Revision (ICD10) (13).

84

### 85 Drugs

86 Prescription data were used for PCAs, including cefcapene pivoxil, cefditoren pivoxil,  
87 ceftoram pivoxil, and tebipenem pivoxil. All PCAs are classified as oral beta-lactam  
88 antibiotics and infections could be a risk factor of hypoglycemia. Therefore, we defined a  
89 control group of several beta-lactam antibiotics with no pivoxil residue, including  
90 amoxicillin, cefdinir, cefaclor, cefalexin, cefotiam, cefpodoxime proxetil, cefuroxime axetil,  
91 faropenem, and sultamicillin.

92

### 93 Patients

94 Data from January 2011 to December 2013 were analyzed retrospectively. The subjects  
95 were children aged 1 month to 5 years old who had a prescription history of the beta-lactam

Y. Tatebe et al., Hypoglycemia caused by pivalate-conjugating antibiotics

96 antibiotics listed above. Neonates and patients with a prescription history of valproic acid,  
97 levocarnitine, or insulin derivatives in the period of diagnosis of hypoglycemia, or the  
98 diagnostic codes E10 (insulin-dependent diabetes mellitus), E70, E71, E72 (amino acids or  
99 fatty acid metabolic disorders), and E74 (abnormal carbohydrate metabolism), were excluded  
100 because valproic acid and levocarnitine affect the serum carnitine level, insulin frequently  
101 induces hypoglycemia, and metabolic diseases can change glucose metabolism.

102

103 Definition of hypoglycemia

104 Hypoglycemia was defined as prescription of 10% or 20% glucose injection or the first  
105 record of ICD10 codes E160, E161 or E162, with exclusion of events if the diagnosis had no  
106 obvious association with PCAs; for example, hyperinsulinemia (E160). While hypoglycemia  
107 defined by diagnostic codes may reflect events of hypoglycemia in the real world to some  
108 extent (14), the identification of hypoglycemic episodes may not be sufficient because it is  
109 not necessary to mention a diagnosis of hypoglycemia in the medical receipt for a health  
110 insurance claim. In Japan, oral glucose or intravenous 10% or 20% glucose are typically  
111 administered to young children with symptomatic hypoglycemia. Thus, we also defined  
112 hypoglycemia in this study as intravenous glucose administration to elevate the power of  
113 detection. We did not define oral glucose intake as indicating a hypoglycemic event because  
114 it was difficult to identify oral supplementation with glucose using the JMDC database.

115

116 Analysis

117 The incidence of defined hypoglycemia was examined within the study period. Eligible  
118 patients were divided into two groups based on prescription of PCAs or control antibiotics.  
119 Age; gender; number of days the drug was supplied; comorbidities causing hypoglycemia,  
120 such as hypopituitarism, adrenal insufficiency or type 2 diabetes mellitus; and conditions in

121 which 10% or 20% glucose might be used, such as gastroenteritis and dehydration, were  
122 summarized using descriptive statistics. Each month in which a study drug was prescribed  
123 was counted as one exposure for each patient. If antibiotics in each group were concurrently  
124 prescribed for a patient in the same month, this exposure was excluded from data analysis. To  
125 exclude hypoglycemia possibly unrelated to antibiotics, antibiotic-related hypoglycemia was  
126 defined if the event occurred in the month of antibiotic exposure or in the following month.

127 Univariate analysis and multivariate logistic regression was performed to investigate  
128 factors associated with defined hypoglycemia. Covariates included gender, age, prescription  
129 of PCAs, and number of days of drug supply. To confirm that age and number of days of  
130 drug supply affected the risk of hypoglycemia induced by PCAs, multivariate analyses with  
131 stratification by age and number of days was performed. Adjusted odds ratios (OR), 95%  
132 confidence intervals (CI), and *P* values are reported. We also conducted univariate and  
133 subgroup analyses to examine the effects of confounding factors of gastroenteritis (ICD10  
134 code: A0), dehydration (E86), adrenal insufficiency (E271, E272, E273, E274, E278, E279,  
135 E896), hypopituitarism (E230, E231, E233, E236, E237, E893) and type 2 diabetes mellitus  
136 (E10, E11, E12, E13, E14). For sensitivity analysis, hypoglycemia was redefined as  
137 diagnostic codes E160, E161, and E162 and intravenous 10% or 20% glucose prescriptions in  
138 the same month, and multivariate logistic analysis was conducted on these data as described  
139 above. All analyses were performed with JMP® v.12 (SAS Institute Inc., Cary, NC, USA).

140

#### 141 Ethics statement

142 Data investigated in this study were deidentified by the JMDC in an unlinked manner, and  
143 therefore, informed consent was not required from patients. The study protocol and  
144 exemption of informed consent were approved by the Ethics Committee of Okayama  
145 University Graduate School of Medicine, Dentistry and Pharmaceutical Sciences and

146 Okayama University Hospital.

147

## 148 **Results**

### 149 Patients

150 A total of 179,594 patients (male, 93,743 [52.2%]) were eligible for the study. The mean  
151 age ( $\pm$ SD) at dispensing was 3.16 ( $\pm$ 1.55) years old (Table 1). A total of 328 patients were  
152 excluded from analyses due to a prescription history of insulin derivatives, valproate, or  
153 levocarnitine. The total number of visits with an antibiotics prescription were 871,440,  
154 including 454,153 for PCAs and 417,287 for control antibiotics. The mean age and  
155 proportion of males in the PCA group were significantly higher than those in the control  
156 group. The number of days of drug supply was lower in the PCA group, but the background  
157 of patients was slightly different in the two groups. Prescription patterns over time were  
158 similar in each group (Fig. 1).

159

### 160 Incidence of hypoglycemia

161 Univariate and multivariate logistic regression analyses revealed that the incidence of  
162 hypoglycemia (defined by ICD10 codes or prescription of 10% or 20% glucose injection)  
163 was higher in the PCA group compared with the control group (adjusted OR 1.18, 95% CI  
164 1.12–1.24,  $P < 0.001$ , Table 2). In these analyses, male gender and age were associated with  
165 the risk of hypoglycemia (Table 2). While older age was related to a higher incidence of  
166 hypoglycemia, younger children, and especially infants, were more susceptible to the effect  
167 of PCAs on hypoglycemia (Table 3). The risk of hypoglycemia was also significantly  
168 increased with use of PCAs for  $\leq 7$  days, and this effect tended to increase for a longer period  
169 of drug supply (Table 3).

170 For sensitivity analysis, we redefined hypoglycemia as an event with a simultaneous ICD

171 code and prescription of 10% or 20% glucose injection. The results of multivariate logistic  
172 regression analysis showed that the incidence of hypoglycemia with this definition was still  
173 higher in the PCA group (adjusted OR 1.29, 95% CI 1.11–1.49,  $P < 0.001$ , Table 4).

174 Patients with gastroenteritis and dehydration are often treated with glucose-containing  
175 fluids, and these events might have been included as antibiotics-induced hypoglycemia.  
176 Moreover, the hypoglycemia was caused by other factors (Table 5). Therefore, we conducted  
177 subgroup analyses in patients without dehydration, gastroenteritis, adrenal insufficiency,  
178 hypopituitarism, or type 2 diabetes mellitus. The incidence of hypoglycemia was still higher  
179 in the PCA group compared with the control group in all of these subgroup analyses (Table  
180 6).

181

## 182 **Discussion**

183 This retrospective population-based study using the JMDC claims database showed that  
184 prescription of PCAs increased the incidence of hypoglycemia, defined as a prescription of  
185 10% or 20% glucose injection or based on ICD10 codes, compared with other oral beta-  
186 lactam antibiotics in young children. These results were reproduced in subgroup and  
187 sensitivity analyses. In addition, we found that prescription patterns of PCAs and other  
188 antibiotics has not changed despite the warnings of the PMDA and JPS concerning PCA-  
189 induced hypoglycemia since April 2012.

190 Several reports have shown that long exposure to pivalic acid can induce hypoglycemia  
191 following hypocarnitinemia (11, 12, 15), but in the current study we found that even use of  
192 PCAs for  $\leq 7$  days significantly increased the incidence of hypoglycemia (Table 3). Previous  
193 studies found that short term administration of pivampicillin and pivmecillinam resulted in a  
194 reduction of the mean serum creatine concentration to 15% of the pretreatment value in seven  
195 girls over a long period (16), and 7-day use of pivmecillinam reduced the serum carnitine by



196 about 30% (17). This suggests that PCA-induced hypoglycemia can occur in short-term use.

197 Febrile illnesses are common in young children and the cause of fever is viral infections in  
198 many cases. Therefore, use of antibiotics is usually unnecessary (18), but antibiotics are often  
199 used in practice. In the ambulatory setting, >50% of children diagnosed with ARTIs received  
200 antibiotic prescriptions in the United States, while the estimated prevalence of ARTIs is  
201 <30% (19). A recent study using an administrative claims database in Japan showed that  
202 antimicrobial agents were prescribed for >60% of pre-school children in the cohort and that  
203 most prescribed antimicrobial agents were third-generation cephalosporins (20). Our data  
204 showed that >50% of prescribed beta-lactam antibiotics were PCAs, and this was consistent  
205 across the study period (Fig. 1). Therefore, PCAs are among the most prescribed antibiotics  
206 to young children in Japan, but these broad-spectrum antibiotics are probably unnecessary in  
207 many cases (21). Given that the unnecessary antibiotics were mainly third-generation  
208 cephalosporins, including PCAs, the risk of hypoglycemia induced by PCAs is not negligible,  
209 even though the incidence of hypoglycemia differed slightly between the PCA and control  
210 groups.

211 There are several limitations in this study. First, we did not consider the effects of  
212 concomitant medicines on hypoglycemia, except for insulin derivatives, valproic acid and  
213 levocarnitine. Indeed, hypoglycemia could also be induced by drugs such as quinolones,  
214 cibenzoline, pentamidine, and beta blockers (5). However, because most young children do  
215 not have morbidities treated with these drugs and most quinolones are contraindicated for  
216 children in Japan, it is unlikely that these drugs were prescribed in our subjects. Moreover,  
217 since it is unlikely that use of these drugs would affect the selection of antibiotics, the  
218 proportion of patients taking these drugs was presumably similar in the two groups. Second,  
219 the true incidence of hypoglycemia could not be determined because this study was  
220 conducted using the JMDC claims database and hypoglycemia was detected by ICD10 codes

221 or prescription of 10% or 20% glucose injection, without using laboratory data for blood  
222 sugar levels. Furthermore, the time relationship between PCA use and hypoglycemia was  
223 unclear because we did not have the accurate dates for prescription of antibiotics and onset of  
224 hypoglycemia. Moreover, we had limited information from the claims database to adjust for  
225 differences in confounding factors between the groups, although subgroup analysis showed  
226 that prescription of PCAs was also a risk for hypoglycemia in children without several  
227 comorbidities. However, Japanese guidelines for pediatric ARTI recommend use of  
228 amoxicillin and third-generation cephalosporins such as cefditoren pivoxil (7, 22), and the  
229 selection of antibiotics is often dependent on physician preference in clinical practice.  
230 Therefore, the choice of antibiotics was unlikely to have been influenced by comorbidities  
231 that induce hypoglycemia. In fact, comorbidities of patients in the study were similar in each  
232 group (Table 1). Therefore, our finding that prescription of PCAs was associated with  
233 increased hypoglycemic events in young children is likely to be reliable. This is also  
234 supported by results showing that infants with lower serum carnitine and those with long-  
235 term antibiotic prescriptions were more susceptible to pivalate-induced hypoglycemia (Table  
236 3).

237

## 238 **Conclusion**

239 This retrospective cohort study showed that prescription of PCAs in young children  
240 increases the risk of hypoglycemia, compared with other antibiotics. Within the limitations of  
241 the study, this finding suggests that use of PCAs for young children should be avoided, even  
242 for a short time period.

243

## 244 **Acknowledgements**

245 The study was supported by JMDC. No grant from a funding agency in the public,

Y. Tatebe et al., Hypoglycemia caused by pivalate-conjugating antibiotics

246 commercial, or not-for-profit sectors was received. The authors have no conflicts of interest  
247 to declare.

248 The authors' contributions were as follows: conception and design of the study: Tatebe,  
249 Mikami, and Hinotsu; collection and assembly of data: Tatebe and Hinotsu; analysis and  
250 interpretation of data: Tatebe, Koyama, and Hinotsu; drafting of the article: Tatebe, Koyama,  
251 Kitamura, and Hinotsu; critical revision of the article for important intellectual content:  
252 Hinotsu, Kitamura, and Sendo; final approval of the article: All authors.

253 **References**

- 254 1. Ghosh A, Banerjee I, Morris AA. 2015. Recognition, assessment and management of  
255 hypoglycaemia in childhood. *Arch Dis Child*. 101:575–580.
- 256 2. Kerstjens JM, Bocca-Tjeertes IF, de Winter AF, Reijneveld SA, Bos AF. 2012. Neonatal  
257 morbidities and developmental delay in moderately preterm-born Children. *Pediatrics*  
258 130:e265–e272.
- 259 3. Ito M, Fukuda M, Suzuki Y, Wakamoto H, Ishii E. 2017. Carnitine-related  
260 hypoglycemia caused by 3 days of pivalate antibiotic therapy in a patient with severe  
261 muscular dystrophy: A case report. *BMC Pediatr* 17:73.
- 262 4. Murad MH, Coto-Yglesias F, Wang AT, Sheidaee N, Mullan RJ, Elamin MB, Erwin PJ,  
263 Montori VM. 2009. Clinical review: Drug-induced hypoglycemia: a systematic review. *J*  
264 *Clin Endocrinol Metab* 94:741–745.
- 265 5. Thornton PS, Stanley CA, De Leon DD, Harris D, Haymond MW, Hussain K, Levitsky  
266 LL, Murad MH, Rozance PJ, Simmons RA, Sperling MA, Weinstein DA, White NH,  
267 Wolfsdorf JJ; Pediatric Endocrine Society. 2015. Recommendations from the Pediatric  
268 Endocrine Society for Evaluation and Management of Persistent Hypoglycemia in  
269 Neonates, Infants, and Children. *J Pediatr* 167:238–245.
- 270 6. Uehara S, Sunakawa K, Eguchi H, Ouchi K, Okada K, Kurosaki T, Suzuki H, Tsutsumi  
271 H, Haruta T, Mitsuda T, Yamazaki T. 2011. Japanese Guidelines for the Management of  
272 Respiratory Infectious Diseases in Children 2007 with focus on pneumonia. *Pediatr Int*  
273 53:264–276.
- 274 7. Melegh B, Kerner J, Bieber LL. 1987. Pivampicillin-promoted excretion of  
275 pivaloylcarnitine in humans. *Biochem Pharmacol* 36:3405–3409.
- 276 8. Bremer J. 1983. Carnitine--metabolism and functions. *Physiol Rev* 63:1420–1480.
- 277 9. Stanley CA. 2004. Carnitine deficiency disorders in children. *Ann N Y Acad Sci*

Y. Tatebe et al., Hypoglycemia caused by pivalate-conjugating antibiotics

- 278 1033:42–51.
- 279 10. Makino Y, Sugiura T, Ito T, Sugiyama N, Koyama N. 2007. Carnitine-associated  
280 encephalopathy caused by long-term treatment with an antibiotic containing pivalic acid.  
281 *Pediatrics* 120:e739–e741.
- 282 11. Kobayashi H, Fukuda S, Yamada K, Hasegawa Y, Takahashi T, Purevsuren J,  
283 Yamaguchi S. 2016. Clinical Features of Carnitine Deficiency Secondary to Pivalate-  
284 Conjugated Antibiotic Therapy. *J Pediatr* 173:183–187.
- 285 12. Nasu T, Suzuki M, Uetake K, Kubota M. 2014. Newborn hypocarnitinemia due to long-  
286 term transplacental pivalic acid passage. *Pediatr Int* 56:772–774.
- 287 13. Kimura S, Sato T, Ikeda S, Noda M, Nakayama T. 2010. Development of a database of  
288 health insurance claims: standardization of disease classifications and anonymous record  
289 linkage. *J Epidemiol* 20:413–419.
- 290 14. Ginde AA, Blanc PG, Lieberman RM, Camargo CA Jr. 2008. Validation of ICD-9-CM  
291 coding algorithm for improved identification of hypoglycemia visits. *BMC Endocr*  
292 *Disord* 8:4.
- 293 15. Okumura A, Morita M, Ikeno M, Abe S, Shimizu T. 2011. Acute encephalopathy in a  
294 child with secondary carnitine deficiency due to pivalate-conjugated antibiotics.  
295 *Pediatric Infectious Disease Journal* 30:92.
- 296 16. Holme E, Greter J, Jacobson CE, Lindstedt S, Nordin I, Kristiansson B, Jodal U. 1989.  
297 Carnitine deficiency induced by pivampicillin and pivmecillinam therapy. *Lancet* 2:469–  
298 473.
- 299 17. Abrahamsson K, Holme E, Jodal U, Lindstedt S, Nordin I. 1995. Effect of short-term  
300 treatment with pivalic acid containing antibiotics on serum carnitine concentration--a  
301 risk irrespective of age. *Biochem Mol Med* 55:77–79.
- 302 18. Colvin JM, Muenzer JT, Jaffe DM, Smason A, Deych E, Shannon WD, Arens MQ,

Y. Tatebe et al., Hypoglycemia caused by pivalate-conjugating antibiotics

- 303 Buller RS, Lee WM, Weinstock EJ, Weinstock GM, Storch GA. 2012. Detection of  
304 viruses in young children with fever without an apparent source. *Pediatrics* 130:e1455–  
305 e1462.
- 306 19. Kronman MP, Zhou C, Mangione-Smith R. 2014. Bacterial prevalence and antimicrobial  
307 prescribing trends for acute respiratory tract infections. *Pediatrics* 134:e956–965.
- 308 20. Yoshida S, Takeuchi M, Kawakami K. 2017. Prescription of antibiotics to pre-school  
309 children from 2005 to 2014 in Japan: a retrospective claims database study. *J Public*  
310 *Health (Oxf)* 1–7 doi:10.1093/pubmed/fox045.
- 311 21. Gerber JS, Ross RK, Bryan M, Localio AR, Szymczak JE, Wasserman R, Barkman D,  
312 Odeniyi F, Conaboy K, Bell L, Zaoutis TE, Fiks AG. 2017. Association of broad- vs  
313 narrow-spectrum antibiotics with treatment failure, adverse events, and quality of life in  
314 children with acute respiratory tract infections. *JAMA* 318:2325–2336.
- 315 22. Ozaki T, Nishimura N, Suzuki M, Narita A, Watanabe N, Ahn J, Koyama N, Ushida H,  
316 Nakane K, Yasuda N, Funahashi K. 2008. Five-day oral cefditoren pivoxil versus 10-day  
317 oral amoxicillin for pediatric group A streptococcal pharyngotonsillitis. *J Infect*  
318 *Chemother* 14:213–218.
- 319

320 Table 1. Characteristics of study patients in the Japan Medical Data Center claims database.

| Characteristics               | Control group   | PCA group      |
|-------------------------------|-----------------|----------------|
|                               | n = 134,412     | n = 142,065    |
| Number of visits <sup>a</sup> | 417,267         | 454,153        |
| Age                           |                 |                |
| Mean (SD)                     | 3.1 (1.55)      | 3.21 (1.55)    |
| Infant (%)                    | 33,569 (8.0)    | 31,463 (6.9)   |
| 1–2 years old (%)             | 162,691 (39.0)  | 169,619 (37.3) |
| 3–4 years old (%)             | 158,426 (38.0)  | 176,961 (39.0) |
| 5 years old (%)               | 62,601 (15.0)   | 76,110 (16.8)  |
| Gender                        |                 |                |
| Male (%)                      | 70,404 (52.4)   | 74,606 (52.5)  |
| Number of days of drug supply |                 |                |
| Mean (SD)                     | 5.36 (3.9)      | 4.90 (2.3)     |
| ≤7 days (%)                   | 358,172 (85.83) | 409,182 (90.1) |
| 8–14 days (%)                 | 53,106 (12.73)  | 42,328 (9.32)  |
| ≥15 days (%)                  | 6,009 (1.44)    | 2,643 (0.58)   |
| Comorbidities                 |                 |                |
| Dehydration (%)               | 6,201 (1.49)    | 8,680 (1.91)   |
| Gastroenteritis (%)           | 87,201 (20.9)   | 89,593 (19.73) |
| Adrenal insufficiency (%)     | 41 (0.01)       | 61 (0.013)     |
| Hypopituitarism               | 194 (0.046)     | 253 (0.056)    |
| Type 2 diabetes mellitus (%)  | 46 (0.011)      | 47 (0.01)      |

321 SD: standard deviation.

322 <sup>a</sup>Sum of visits by month that study drugs were prescribed.

323

Y. Tatebe et al., Hypoglycemia caused by pivalate-conjugating antibiotics

324 Table 2. Results of multivariate analysis for risk factors associated with hypoglycemia.

| Variable                            | Reference | OR (95% CI)      | Adjusted OR<br>(95% CI) | <i>P</i> value |
|-------------------------------------|-----------|------------------|-------------------------|----------------|
| <b>Antibiotics</b>                  |           |                  |                         |                |
| PCAs                                | Control   | 1.19 (1.13–1.25) | 1.18 (1.12–1.24)        | <0.001         |
| <b>Gender</b>                       |           |                  |                         |                |
| Male                                | Female    | 1.14 (1.08–1.20) | 1.14 (1.08–1.20)        | <0.001         |
| <b>Age</b>                          |           |                  |                         |                |
| 1–2 years old                       | Infant    | 1.00 (0.90–1.12) | 1.00 (0.96–1.10)        | 0.938          |
| 3–4 years old                       | Infant    | 1.37 (1.23–1.53) | 1.36 (1.22–1.52)        | <0.001         |
| 5 years old                         | Infant    | 1.32 (1.18–1.49) | 1.31 (1.17–1.48)        | <0.001         |
| <b>Number of days drug supplied</b> |           |                  |                         |                |
| 8–14 days                           | ≤7 days   | 1.05 (0.97–1.13) | 1.06 (0.98–1.15)        | 0.132          |
| ≥15 days                            | ≤7 days   | 0.93 (0.71–1.20) | 0.96 (0.75–1.28)        | 0.623          |

325 OR, odds ratio; CI, confidence interval; SD, standard deviation; PCAs, pivalate-conjugated  
 326 antibiotics.

327



Y. Tatebe et al., Hypoglycemia caused by pivalate-conjugating antibiotics

328 Table 3. Effect of PCAs on the risk of hypoglycemia with stratification by age or number of  
329 days of drug supply.

| Variable                     | Adjusted OR (95% CI) | <i>P</i> value |
|------------------------------|----------------------|----------------|
| Age                          |                      |                |
| 0 years old                  | 1.32 (1.08–1.63)     | 0.007          |
| 1–2 years old                | 1.20 (1.10–1.32)     | <0.001         |
| 3–4 years old                | 1.15 (1.06–1.24)     | <0.001         |
| 5 years old                  | 1.16 (1.03–1.31)     | 0.017          |
| Number of days drug supplied |                      |                |
| ≤7 days                      | 1.17 (1.11–1.24)     | 0.007          |
| 8–14 days                    | 1.22 (1.05–1.41)     | 0.011          |
| ≥15 days                     | 1.57 (0.90–2.69)     | 0.11           |

330 OR, odds ratio; CI, confidence interval; PCAs, pivalate-conjugated antibiotics.

331

332 Table 4. Results of multivariate analysis as sensitivity analysis for hypoglycemia defined as  
333 prescription of 10 or 20% glucose injection and by ICD10 code.

| Variable                     | Reference | Adjusted OR<br>(95% CI) | <i>P</i> value |
|------------------------------|-----------|-------------------------|----------------|
| Antibiotics                  |           |                         |                |
| PCAs                         | Control   | 1.29 (1.11–1.49)        | <0.001         |
| Gender                       |           |                         |                |
| Male                         | Female    | 1.26 (1.09–1.46)        | 0.002          |
| Age                          |           |                         |                |
| 1–2 years old                | Infant    | 1.35 (0.96–1.96)        | 0.085          |
| 3–4 years old                | Infant    | 1.91 (1.37–2.76)        | <0.001         |
| 5 years old                  | Infant    | 1.72 (1.20–2.53)        | 0.003          |
| Number of days drug supplied |           |                         |                |
| 8–14 days                    | ≤7 days   | 1.14 (0.91–1.41)        | 0.258          |
| ≥15 days                     | ≤7 days   | 1.18 (0.54–2.22)        | 0.645          |

334 OR, odds ratio; CI, confidence interval; PCAs, pivalate-conjugated antibiotics

335

Y. Tatebe et al., Hypoglycemia caused by pivalate-conjugating antibiotics

336 Table 5. Influence of comorbidities on the risk of hypoglycemia.

| Variable                 | OR (95% CI)      | <i>P</i> value |
|--------------------------|------------------|----------------|
| Dehydration              | 33.6 (31.8–35.6) | <0.001         |
| Gastroenteritis          | 3.13 (2.97–3.30) | <0.001         |
| Adrenal insufficiency    | 4.40 (1.40–13.9) | 0.033          |
| Hypopituitarism          | 2.65 (1.32–5.33) | 0.013          |
| Type 2 diabetes mellitus | 4.84 (1.53–15.3) | 0.026          |

337 OR, odds ratio; CI, confidence interval.

Y. Tatebe et al., Hypoglycemia caused by pivalate-conjugating antibiotics

338 Table 6. Risk of hypoglycemia induced by PCAs in subgroups of patients without  
339 comorbidities.

| Subgroup                 | Adjusted OR (95% CI) | <i>P</i> value |
|--------------------------|----------------------|----------------|
| Dehydration              |                      |                |
| No                       | 1.13 (1.06–1.20)     | <0.001         |
| Gastroenteritis          |                      |                |
| No                       | 1.13 (1.05–1.21)     | <0.001         |
| Adrenal insufficiency    |                      |                |
| No                       | 1.18 (1.12–1.24)     | <0.001         |
| Hypopituitarism          |                      |                |
| No                       | 1.18 (1.12–1.24)     | <0.001         |
| Type 2 diabetes mellitus |                      |                |
| No                       | 1.18 (1.12–1.24)     | <0.001         |

340 OR, odds ratio; CI, confidence interval; PCAs, pivalate-conjugated antibiotics.

341

342 **Figure Legend**

343 Figure 1. Prescription pattern of pivalate-conjugated antibiotics (PCAs) or control antibiotics  
344 in the study period. Black and grey lines represent the number of visits at which PCAs and  
345 control antibiotics were prescribed, respectively.

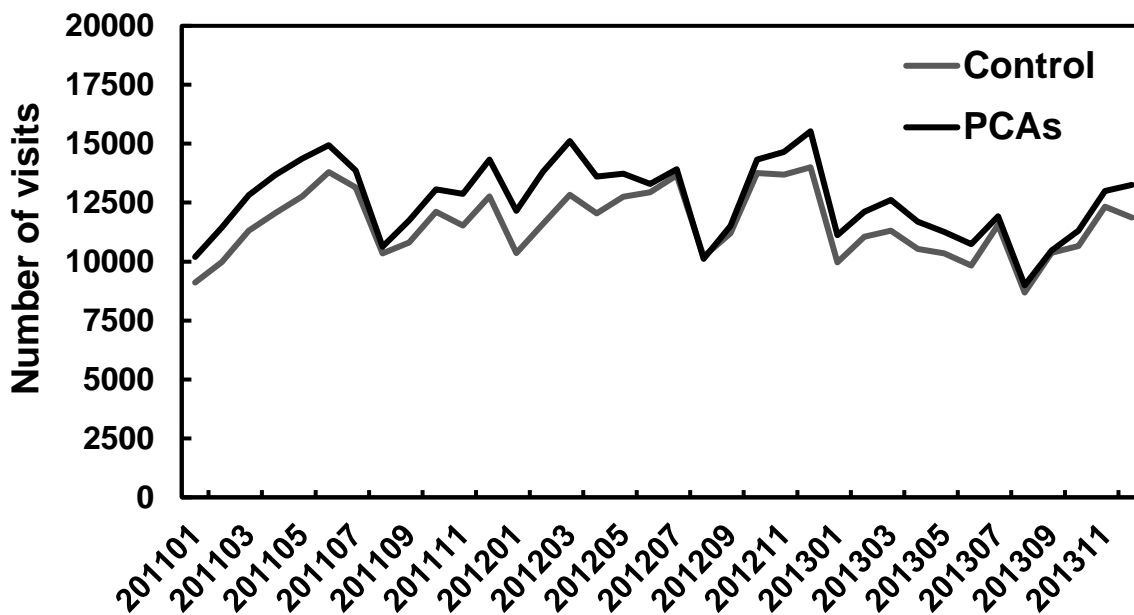

Source: http://biorxiv.org/content/10.1101/350595v1.full.pdf
